# Supplementary material for: Defective Resection at DNA Double-Strand Breaks Leads to De Novo Telomere Formation and Enhances Gene Targeting
Source: PubMed Central journal article supplement (PMC2869328; doi:10.1371/journal.pgen.1000948), 2010-05-13
Supplement: pgen.1000948.s006.pdf [file pgen.1000948.s006.pdf]

**Table S1. Genotype of strains used in the study**

| strain name | parental strain | genotype                                                                                                                                                                                   | reference  |
|-------------|-----------------|--------------------------------------------------------------------------------------------------------------------------------------------------------------------------------------------|------------|
| tGI354      | -               | <i>hml::ADE1 MATa-inc hmr::ADE1 ade1 leu2-3,112 lys5 trp1::hisG ura3-52 ade3::GAL::HO arg5,6::HPH::MATa</i>                                                                                | [1]        |
| tGI379      | tGI354          | <i>rad51::KanMX</i>                                                                                                                                                                        | this study |
| yGI234      | -               | <i>hml::ADE1/HML MATa/MAT<math>\alpha</math>-inc hmr::ADE1/HMR ade1/ade1 leu2-3,112/leu2-3,112 lys5/LYS5 MET13/met13 trp1::hisG/trp1 ura3-52/ura3 THR4/thr4::URA3 ade3::GAL10::HO/ADE3</i> | this study |
| yWH847      | yGI234          | <i>exo1::TRP1/exo1::TRP1 sgs1::KANMX/sgs1::KANMX</i>                                                                                                                                       | this study |
| MK181       | -               | <i>MATa-inc ura3-HOcs-inc ade3::GAL::HO ade2-1 leu2-3,112 his3-11,15 trp1-1 can1-100 LYS2::ura3-HOcs::LYS2 (5.6 kb) on chrII; LYS2 on chrXV</i>                                            | [2]        |
| yZZ233      | MK181           | <i>exo1::TRP1</i>                                                                                                                                                                          | this study |
| yZZ240      | MK181           | <i>sgs1::KANMX</i>                                                                                                                                                                         | this study |
| yZZ242      | MK181           | <i>exo1::TRP1 sgs1::KANMX</i>                                                                                                                                                              | this study |
| JKM139      | -               | <i>MATa ho hml::ADE1 hmr::ADE1 ade1-100 leu2-3,112 lys5 trp1::hisG ura3-52 ade3::GAL10::HO</i>                                                                                             | [3]        |
| yZZ115      | JKM139          | <i>exo1::TRP1 sgs1::KANMX</i>                                                                                                                                                              | this study |
| yZZ116      | JKM139          | <i>sgs1::KANMX</i>                                                                                                                                                                         | this study |
| yZZ117      | JKM139          | <i>exo1::TRP1</i>                                                                                                                                                                          | this study |
| yWH54       | JKM139          | <i>pif1-m2 dna2::KANMX</i>                                                                                                                                                                 | this study |
| AM1003      | -               | <i>MATa-LEU2-tel/MAT<math>\alpha</math>-inc ade1 met13 ura3 leu2-3,112/leu2 thr4 lys5 hml::ADE1/hml::ADE3 hmr::HPH ade3::GAL-HO FS2::NAT/FS2</i>                                           | [4]        |
| yWH121      | AM1003          | <i>pif1-m2</i>                                                                                                                                                                             | this study |
| yWH576      | AM1003          | <i>exo1::TRP1</i>                                                                                                                                                                          | this study |
| yWH578      | AM1003          | <i>sgs1::KANMX</i>                                                                                                                                                                         | this study |
| yWH612      | AM1003          | <i>exo1::TRP1 sgs1::KANMX</i>                                                                                                                                                              | this study |
| yWH747      | AM1003          | <i>pif1-m2 exo1::TRP1 sgs1::KANMX</i>                                                                                                                                                      | this study |
| yWH942      | AM1003          | <i>pif1-m2 sml1::TRP1 mec1::KANMX</i>                                                                                                                                                      | this study |
| yWH786      | AM1003          | <i>yku70::KANMX exo1::TRP1 sgs1::URA3</i>                                                                                                                                                  | this study |
| yWH787      | AM1003          | <i>yku70::KANMX pif1-m2 exo1::TRP1 sgs1::URA3</i>                                                                                                                                          | this study |
| yWH917      | AM1003          | <i>pif1-m1-4A::TRP1 pif1-m2 exo1::KANMX sgs1::URA3</i>                                                                                                                                     | this study |
| yWH801      | AM1003          | <i>CDC13-13MYC-KANMX</i>                                                                                                                                                                   | this study |
| yWH803      | AM1003          | <i>pif1-m2 CDC13-13MYC-KANMX</i>                                                                                                                                                           | this study |

|        |        |                                                                              |            |
|--------|--------|------------------------------------------------------------------------------|------------|
| yWH805 | AM1003 | <i>exo1::TRP1 sgs1::URA3 CDC13-13MYC-KANMX</i>                               | this study |
| yWH807 | AM1003 | <i>pif1-m2 exo1::TRP1 sgs1::URA3 CDC13-13MYC-KANMX</i>                       | this study |
| AM476  | -      | <i>MAT<math>\alpha</math>-inc ade1 met13 ura3 leu2,3-112 trp1 thr4::URA3</i> | this study |

---

1. Ira G, Malkova A, Liberi G, Foiani M, Haber JE (2003) Srs2 and Sgs1-Top3 suppress crossovers during double-strand break repair in yeast. *Cell* 115: 401-411.
2. Inbar O, Kupiec M (1999) Homology search and choice of homologous partner during mitotic recombination. *Mol Cell Biol* 19: 4134-4142.
3. Lee SE, Moore JK, Holmes A, Umezu K, Kolodner RD, et al. (1998) *Saccharomyces* Ku70, mre11/rad50 and RPA proteins regulate adaptation to G2/M arrest after DNA damage. *Cell* 94: 399-409.
4. Deem A, Barker K, Vanhulle K, Downing B, Vayl A, et al. (2008) Defective break-induced replication leads to half-crossovers in *Saccharomyces cerevisiae*. *Genetics* 179: 1845-1860.
