# Supplementary material for: Defective Resection at DNA Double-Strand Breaks Leads to De Novo Telomere Formation and Enhances Gene Targeting
Source: PubMed Central journal article supplement (PMC2869328; doi:10.1371/journal.pgen.1000948), 2010-05-13
Supplement: pgen.1000948.s007.pdf [file pgen.1000948.s007.pdf]

**Table S2. Sequences of DNA primers used in the study.**

| figure                    | probe name | sequences                                                                                                    | reference          |
|---------------------------|------------|--------------------------------------------------------------------------------------------------------------|--------------------|
| Fig. 1A                   | P1         | 5'-GATCTGCAGCTCAGTCACATG-3' (ARG5,6 distal 1F)<br>5'-ACTACCTACGCCAACCTATTC-3' (ARG5,6 distal 1R)             | this study         |
|                           | P2         | 5'-GCATTAGGTAAAGAGGCTC-3' (ARG5,6 distal 2F)<br>5'-TGTTTGCTCAACCAAGTCAG-3' (ARG5,6 distal 2R)                | this study         |
|                           | P3         | 5'-CATTACAGTGGTGCCACTTG-3' (ARG5,6 distal 3F)<br>5'-CTAGCAATAACTATTCCTC-3' (ARG5,6 distal 3R)                | this study         |
|                           | P4         | 5'-CGTGATTCCAATGGATTTAG-3' (ARG5,6 distal 4F)<br>5'-GGAAATGGCTTGCTTTGTGG-3' (ARG5,6 distal 4R)               | this study         |
| Fig. 2A<br>and<br>Fig. S1 | P1         | 5'-CAATTCGGTAAAGTCATAAG-3' (Allelic HindIII dist F1)<br>5'-CTAGAAGACTCTAATATTCC-3' (Allelic HindIII dist R1) | this study         |
|                           | P2         | 5'-CCAGTTATCGTCCTACGTTTC-3' (BUD5 F1)<br>5'-GGTAAGCCTTGGAACCTTAG-3' (BUD5 R1)                                | (Zhu et al., 2008) |
|                           | P3         | 5'-TCAAGCAAATCGACACATGG-3' (Allelic Eco2 F1)<br>5'-GTATTATACAGCGACAATTCC-3' (Allelic Eco2 R1)                | this study         |
|                           | P4         | 5'-CAGTAATAAGTCGTCCTGAG-3' (Allelic EcoRI dist F1)<br>5'-CACTTGATGCTTCCTTATTG-3' (Allelic EcoRI dist R1)     | this study         |
|                           | P5         | 5'-CTATCGATGGCTCTATAAGAC-3' (SNT1 F1)<br>5'-CACGACTTATTGGACTAGTG-3' (SNT1 R1)                                | (Zhu et al., 2008) |
|                           | Ya         | 5'-GTTCTTTCGGGGAAACTGTA-3' (MAT Ya FP)<br>5'-CCACATTTCTTTGCAACTTC-3' (MAT Ya RP)                             | this study         |
|                           | Styl       | 5'-CTACAAAACCTGTTGATTAGG-3' (Styl FP)<br>5'-CTTTGATTAAGACTACTATC-3' (Styl RP)                                | this study         |
| Fig. 2C                   | P1         | 5'-CCAGTTATCGTCCTACGTTTC-3' (BUD5 F1)<br>5'-GGTAAGCCTTGGAACCTTAG-3' (BUD5 R1)                                | (Zhu et al., 2008) |
|                           | P2         | 5'-CAAGATACTATAACAGGTGG-3' (BPM1 F1)<br>5'-TGCCACTATACTATTTCTTC-3' (BPM1 R1)                                 | this study         |
|                           | P3         | 5'-CACCAATGCATATATATCCG-3' (FEN2 F1)<br>5'-GAATAGTCGACCAGTCTAAC-3' (FEN2 R1)                                 | (Zhu et al., 2008) |
| control                   | TRA1       | 5'-GTCCTAATACGACTTTTCAAATTGTCCTTTATGTCCGTCA-3'<br>5'-ATACTTGTAAGCACTCTTCTGTAGTGAATATCACTTTTG-3'              | (Zhu et al., 2008) |
